RESEARCH ARTICLE

# Distribution of the Unionida (Bivalvia, Paleoheterodonta) from Argentina and its conservation in the Southern Neotropical Region

Santiago Torres<sup>1,2,3</sup>, Luciana Cao<sup>1,3</sup>, Diego Eduardo Gutiérrez Gregoric<sup>1,3</sup>, Micaela de Lucía<sup>1,4</sup>, Francisco Brea<sup>1</sup>, Gustavo Darrigran<sup>1,3\*</sup>

**1** División Zoología Invertebrados, Museo de La Plata, Facultad de Ciencias Naturales y Museo, Universidad Nacional de La Plata (FCNyM-UNLP), La Plata, Argentina, **2** Centro de Investigación y Transferencia Santa Cruz, Argentina (Consejo Nacional de Investigaciones Científicas y Técnicas-CONICET- / Universidad Nacional de la Patagonia Austral -UNPA- / Universidad Tecnológica Nacional -UTN-), Río Gallegos, Argentina, **3** CONICET, La Plata, Argentina, **4** Comisión de Investigaciones Científicas de la Provincia de Buenos Aires (CIC), La Plata, Argentina

\* [invasion@fcnym.unlp.edu.ar](mailto:invasion@fcnym.unlp.edu.ar)

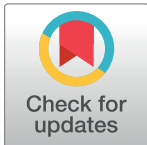

**OPEN ACCESS**

**Citation:** Torres S, Cao L, Gutiérrez Gregoric DE, de Lucía M, Brea F, Darrigran G (2018) Distribution of the Unionida (Bivalvia, Paleoheterodonta) from Argentina and its conservation in the Southern Neotropical Region. PLoS ONE 13(9): e0203616. <https://doi.org/10.1371/journal.pone.0203616>

**Editor:** Donald James Colgan, Australian Museum, AUSTRALIA

**Received:** February 27, 2018

**Accepted:** August 23, 2018

**Published:** September 11, 2018

**Copyright:** © 2018 Torres et al. This is an open access article distributed under the terms of the [Creative Commons Attribution License](https://creativecommons.org/licenses/by/4.0/), which permits unrestricted use, distribution, and reproduction in any medium, provided the original author and source are credited.

**Data Availability Statement:** All relevant data are within the paper and its Supporting Information files.

**Funding:** This work was supported by Universidad de La Plata (11/N795) to Gustavo Darrigran.

**Competing interests:** The authors have declared that no competing interests exist.

## Abstract

Bivalves are one of the most representative groups in the Phylum Mollusca, with over 1,100 freshwater species around the world except Antarctica. About 900 of these species belong to the Order Unionida Gray, 1854. In South America, the distributional range of the Unionida includes all countries in the region and extends as far south as the lakes and rivers of Argentinean-Chilean Patagonia. With the aim of generating distribution maps for the different genera of Unionida in Argentina, we consulted the databases of the nation's main official malacological collections. The data were analyzed and georeferenced using the point-radius method. Spatial analyses were performed with the software Q-GIS 2.16.3 Nødebo using vector layers under the 2007 Argentinean Geodesic Positions reference system. A total 1,833 lots were analyzed, of which it was possible to georeference 1,503. The distribution of Unionida in Argentinean territory was analyzed according to political provinces, Surface Drainage Basins and the Argentinean Protected Areas. Species richness was analyzed using the surface drainage basins of Argentina. We generate distribution maps for each genus and discuss the species threat status and conservation degree in the region. Only six (18%) of the Unionida present in Argentina have been classified by the IUCN, four are *Least Concern* and two are *Data Deficient*. This pattern is also valid for all of South America. More than 95% of the distributional range of the Unionida has no protected area. Conservation management is necessary for the preservation of Unionida diversity in southern South America.

## Introduction

Bivalves are one of the most representative groups in Phylum Mollusca, with over 1,100 freshwater species around the world except in Antarctica [1]. About 900 of these species belong to the Order Unionida Gray, 1854. Over half of them are distributed in the Palearctic and Indotropical Regions,

which constitute the world's main regional hotspots [2], [3]. The Neotropical Region is the third most diverse for Unionida [3], [4], with 249 species distributed in eight families [1]. In South America, the distribution range of the Unionida includes all the countries in the region [5] and extends as far south as the lakes and rivers of the Argentinean-Chilean Patagonia [6], [7], [8], [9].

Unionidan species (naiads) are difficult to identify because the morphological features traditionally considered of taxonomic value are few and highly variable, creating problems both for identification and for the study of phylogenetic relations in the Neotropical Region [10], [11].

Pereira et al. [5] propose that the number of valid species for South America is 112, distributed among 15 genera. Brazil, Argentina and Uruguay are the countries with greatest species diversity. The Brazilian Amazon Basin, with over 40 recorded species, has the greatest richness, followed by the Paraná and Uruguay River Basins with 30 to 40 species, respectively. According to these authors, the unionidan families present in Argentina are Mycetopodidae and Hyriidae. Table 1 presents a checklist of the Unionida present in Argentina following the systematics of Pereira et al. [5], their presence in the Argentinean provinces according to Rumi et al. [9] and the revision of the unionidan database (S1 Appendix). Whereas the Mycetopodidae are exclusively a Neotropical family, the Hyriidae has a wide distribution, including South America, Australia, New Zealand and New Guinea [4]. Despite the difficulty of identification at a specific level, several South American malacologists have provided descriptions based on conchological characters, internal anatomy of soft tissues and descriptions of larval stage [6], [12–22]. For a better understanding of the Order, a synthesis of the groups of Unionida present in Argentina is provided.

## Mycetopodidae

The Mycetopodidae is represented by 19 species, distributed in five genera [5]: *Anodontites*, *Mycetopoda*, *Monocondylaea*, *Fossula* and *Leila*. The genus *Anodontites* is the most widely distributed within the family and includes the highest number of species (10) recorded in Argentina (Table 1).

## Hyriidae

The family Hyriidae is represented by two genera (*Diplodon* and *Castalia*) with 14 species for Argentina (Table 1). The genus *Diplodon* is the most widely distributed naiad not only in Argentina, but also in all South America, with a distribution that ranges from Venezuela to Patagonia [5].

Despite its wide distribution in almost every continent, the rate of extinction of the Unionida is very high compared to other groups like vertebrates [23], [24], [25]. The 2015 IUCN Red List of Threatened Species classified 224 of the 551 worldwide freshwater mussel species as Near Threatened or Threatened. Factors like habitat loss and fragmentation, overexploitation, pollution, loss of host fishes, invasive species, water abstraction and climate change among others are causing the populations of Unionida to decline globally [23], [26], [27].

In South America, mainly in the mid-twentieth century, industrial-scale nacre extraction from naiads had a strong negative impact on natural populations. However, it also enhanced pioneering research in Argentina and the region, where experiments were being conducted on repopulation and sustainable species management [17], [28]. When nacre was replaced by plastic, the use of the resource declined, leading to a slower rate of decrease in mussel populations caused by extraction activities [10]. Nowadays a few sites for naiad population exploitation remain in the Brazilian Amazon [29]. Nevertheless, pollution caused by the plastic industry, among others, has again reduced Unionida populations in recent decades [30].

A new threat appeared in the region in the mid-1980s and early 1990s –the introduction of invasive bivalve species such as *Corbicula fluminea* (Müller, 1774) and *Limnoperna fortunei* (Dunker, 1857) [31], [32]. *Limnoperna fortunei* has an aggressive impact on the environment

**Table 1. Checklist of unionoida and presence in Argentinean provinces.** Jujuy (JU), Salta (SA), Tucumán (TC), Formosa (FM), Chaco (CO), Misiones (MN), Corrientes (CN), Entre Ríos (ER), San Luis (SL), Santiago del Estero (SE), Mendoza (MZ), Córdoba (CB), Santa Fe (SF), Buenos Aires (BA), Neuquén (NQ), Río Negro (RN), Chubut (CH), Catamarca (CT). Numbers indicates quantity of lots.

|                                                    | JU | SA | TC | FM | CO | MN | CN  | ER  | SL | SE | MZ | CB | SF  | BA  | NQ | RN | CH | CT |
|----------------------------------------------------|----|----|----|----|----|----|-----|-----|----|----|----|----|-----|-----|----|----|----|----|
| Unionida                                           |    |    |    |    |    |    |     |     |    |    |    |    |     |     |    |    |    |    |
| Mycetopodidae                                      |    |    |    |    |    |    |     |     |    |    |    |    |     |     |    |    |    |    |
| <i>Anodontites</i> Bruguière, 1792                 | 8  | 8  | 4  | 11 | 18 | 39 | 75  | 152 | 1  | 4  |    | 4  | 93  | 233 | 1  | 11 |    | 2  |
| <i>A. (A.) elongatus</i> (Swainson, 1823)          |    |    |    |    |    |    |     |     |    |    |    |    |     | X   |    |    |    |    |
| <i>A. (A.) lucidus</i> (Orbigny, 1835)             |    |    |    |    |    |    | X   | X   |    |    |    |    | X   |     |    |    |    |    |
| <i>A. (A.) patagonicus</i> (Lamarck, 1819)         | X  | X  | X  | X  | X  | X  | X   | X   | X  | X  |    | X  | X   | X   |    |    |    | X  |
| <i>A. (A.) puelchanus</i> (Orbigny, 1835)          |    |    |    |    |    |    |     |     |    |    |    |    |     |     | X  | X  |    |    |
| <i>A. (A.) soleniformis</i> (Orbigny, 1835)        |    |    |    |    |    | X  | X   | X   |    |    |    |    | X   |     |    |    |    |    |
| <i>A. (A.) tenebricosus</i> (Lea, 1834)            |    |    |    |    |    | X  | X   | X   |    |    |    |    | X   | X   |    |    |    |    |
| <i>A. (A.) trapesialis</i> (Lamarck, 1819)         | X  | X  | X  | X  | X  | X  | X   | X   | X  | X  |    | X  | X   | X   |    |    |    | X  |
| <i>A. (A.) trapezeus</i> (Spix, 1827)              |    |    |    |    |    | X  | X   | X   |    |    |    |    | X   | X   |    |    |    |    |
| <i>A. (Lamproscapha) ensiformis</i> (Spix, 1827)   |    |    |    | X  | X  | X  |     |     |    |    |    |    | X   | X   |    |    |    |    |
| <i>Mycetopoda</i> d'Orbigny, 1835                  |    |    |    | 2  | 1  |    | 6   | 17  |    |    |    |    | 23  | 54  |    |    |    |    |
| <i>M. legumen</i> (Martens, 1888)                  |    |    |    | X  |    |    | X   | X   |    |    |    |    | X   | X   |    |    |    |    |
| <i>M. siliquosa</i> (Spix, 1827)                   |    |    |    |    | X  |    | X   | X   |    |    |    |    | X   | X   |    |    |    |    |
| <i>M. soleniformis</i> Orbigny, 1835               |    |    |    |    |    |    | X   | X   |    |    |    |    | X   | X   |    |    |    |    |
| <i>Monocondylaea</i> Orbigny, 1835                 |    |    |    |    |    | 6  | 10  | 17  |    |    |    |    | 14  | 3   |    |    |    |    |
| <i>M. corrientesensis</i> (Orbigny, 1835)          |    |    |    |    |    | X  | X   | X   |    |    |    |    | X   | X   |    |    |    |    |
| <i>M. minuana</i> (Orbigny, 1835)                  |    |    |    |    |    | X  | X   | X   |    |    |    |    |     | X   |    |    |    |    |
| <i>M. paraguayana</i> (Orbigny, 1835)              |    |    |    |    |    | X  | X   | X   |    |    |    |    | X   | X   |    |    |    |    |
| <i>M. parchappii</i> (Orbigny, 1835)               |    |    |    |    | X  |    | X   |     |    |    |    |    |     |     |    |    |    |    |
| <i>Fossula</i> Lea, 1870                           |    |    |    |    |    |    | 3   |     |    |    |    |    |     |     |    |    |    |    |
| <i>F. fossiculifera</i> (Orbigny, 1835)            |    |    |    |    |    | X  | X   |     |    |    |    |    |     |     |    |    |    |    |
| <i>Leila</i> Gray, 1840                            |    | 2  |    | 2  |    |    |     | 4   |    |    |    |    | 7   | 10  |    |    |    |    |
| <i>L. blainvilliana</i> (Lea, 1834)                |    | X  |    | X  |    |    |     | X   |    |    |    |    | X   | X   |    |    |    |    |
| Hyriidae                                           |    |    |    |    |    |    |     |     |    |    |    |    |     |     |    |    |    |    |
| <i>Diplodon</i> Spix, 1827                         |    | 2  |    | 11 | 12 | 44 | 75  | 148 |    |    |    |    | 98  | 309 | 42 | 44 | 4  |    |
| <i>D. (D.) chilensis</i> (Gray, 1828)              |    |    |    |    |    |    |     |     |    | X  |    |    |     | X   | X  | X  | X  |    |
| <i>D. (D.) delodontus</i> (Lamarck, 1819)          |    |    |    |    |    |    |     | X   |    |    |    |    | X   | X   |    |    |    |    |
| <i>D. (D.) parallelopedon</i> (Lea, 1834)          |    |    |    | X  | X  | X  | X   | X   |    |    |    |    | X   | X   |    |    |    |    |
| <i>D. (D.) parodizi</i> Bonetto, 1960              |    |    |    | X  | X  |    |     | X   |    |    |    |    | X   | X   |    |    |    |    |
| <i>D. (D.) rhuacoicus</i> (Orbigny, 1835)          |    |    |    |    |    |    |     | X   |    |    |    |    |     | X   |    |    |    |    |
| <i>D. (D.) wymanii</i> (Lea, 1860)                 |    |    |    |    |    |    |     | X   |    |    |    |    |     |     |    |    |    |    |
| <i>D. (Rhipidodonta) burroughianus</i> (Lea, 1834) |    |    |    |    |    |    | X   | X   |    |    |    |    | X   | X   |    |    |    |    |
| <i>D. (R.) charruanus</i> (Orbigny, 1835)          |    |    |    | X  |    |    | X   | X   |    |    |    |    | X   | X   |    |    |    |    |
| <i>D. (R.) hyaleus</i> (Orbigny, 1835)             |    |    |    | X  | X  | X  | X   | X   |    |    |    |    | X   | X   |    |    |    |    |
| <i>D. (R.) peraeiformis</i> (Lea, 1860)            |    |    |    |    |    |    | X   |     |    |    |    |    |     |     |    |    |    |    |
| <i>D. (R.) variabilis</i> (Maton, 1811)            |    |    |    |    |    |    | X   | X   |    |    |    |    | X   | X   |    |    |    |    |
| <i>D. paranensis</i>                               |    |    |    | X  | X  |    | X   | X   |    |    |    |    |     | X   |    |    |    |    |
| <i>Castalia</i> Lamarck, 1819                      |    | 2  |    | 6  | 1  | 4  | 31  | 28  |    |    |    |    | 49  | 59  |    |    |    |    |
| <i>Castalia inflata</i> Orbigny, 1835              |    | X  |    | X  |    | X  | X   | X   |    |    |    |    | X   | X   |    |    |    |    |
| <i>C. psammoica</i> (Orbigny, 1835)                |    |    |    | X  |    | X  | X   | X   |    |    |    |    | X   | X   |    |    |    |    |
| <i>Total of species</i>                            | 2  | 5  | 2  | 12 | 9  | 14 | 23  | 24  | 2  | 2  | 1  | 2  | 22  | 25  | 2  | 2  | 1  | 2  |
| <i>Total of lots</i>                               | 8  | 14 | 4  | 32 | 32 | 93 | 200 | 366 | 1  | 4  | 0  | 4  | 284 | 668 | 43 | 55 | 4  | 2  |

For the systematic Pereira et al. [5] was followed. Checklist in Argentinean provinces was made according with Rumi et al. [9] and the revision of the unionidan database (S1 Appendix).

<https://doi.org/10.1371/journal.pone.0203616.t001>

because it is an ecosystem engineer [32]. These bioinvasions have changed the structure of communities in impacted freshwater bodies, probably causing further reduction of Unionidan species abundance [30], [33].

Although taxonomical and biological studies of Unionida in Argentina increased during the 1960s and 70s [6], [12], [14], [15], [17], [18], [34], [35], [36], [37] they were discontinued in the late twentieth and early twenty-first centuries, leading to deficient knowledge on current populations. The species *Diplodon (Diplodon) chilensis* (Gray, 1828) is an exception, as research has been conducted into the physiology and toxicology of its populations in Patagonia [38], [39].

According to Klunzinger et al. [40], precise delimitation of the geographical range of a species is important for conservation planning and biogeographic studies. Additionally, this type of research provides current environmental data through sampling activities and historical environmental data through biological collections.

The aim of this study is to georeference the Unionida lots contained in Argentina's main malacological collections, to generate maps of distributional range at genus level and compare them to other distributions included in the available literature of the Unionida. The results of this study will shed light for further research, to estimate the degree of threat for the unionidan species [41] and develop plans for creating potential conservation priority areas.

## Materials and methods

The databases of Argentina's main malacological collections containing unionidan specimens were reviewed: Museo de La Plata (MLP), Museo de Ciencias Naturales "Bernardino Rivadavia" (MACN), Fundación Miguel Lillo (FML) and Museo de Santa Fe (MSF). For distributional analysis, all the information of the collections was used at a generic level. Data were georeferenced using the point radius method following the protocols set forth by Wieckzorec et al. [42]. The South American Hydrographic Regions proposed by Bonetto [43] were followed (Fig 1). The Surface Drainage Basins of Argentina were provided by the National Hydrological Information System of the National Sub-secretariat of Hydrological Resources of Argentina (SsRH) (Fig 1A) [44], [45]. A complete description of the Surface Drainage Basins can be found in Giraut et al. [44] and SsRH [45]. The Argentinean Protected Areas (APA) used in this work represent both National and Provincial jurisdictions [46], [47]. The maps of APA used in the present work were provided by Sistema Federal de Áreas Protegidas (SiFAP) [46]. For all spatial analyses, all vector layers were used under the Argentinean Geodesic Positions reference system with a Gauss-Krüger flat projection that divides the world into bands [48]. Species richness was analyzed using the surface drainage basins of Argentina and the presence of species of naiads in those basins following Rumi et al [49]. All the maps presented in this work were generated by the free-software Q-GIS 2.16.3 Nødebo.

## Results

### Distribution of unionida in surface drainage basins

A total of 1,833 lots was analyzed (58% of the lots were from MACN collections, 41% from MLP and 1% from FML and MSF). Of these, 1,503 lots were georeferenced (Fig 2B). The remaining 330 lots could not be georeferenced because of lack of information about the collection localities, including lots from the FML and MSF. A list with basic information of the lots used in this work is presented in S1 Appendix. Eighteen of the 23 Argentinean political provinces have at least one naiad species (Table 1). Naiad distribution ranges from northern Argentina (23°9'28"S, 64°19'47"W) (Jujuy Province) to the Patagonian lakes in the south (42°58'35"S, 71°31'52"W) (Chubut Province).

The Plata Basin was the hydrographic system with the highest richness, with species predominantly in the Paraná and Uruguay rivers and their tributaries (Fig 2C). Patagonia

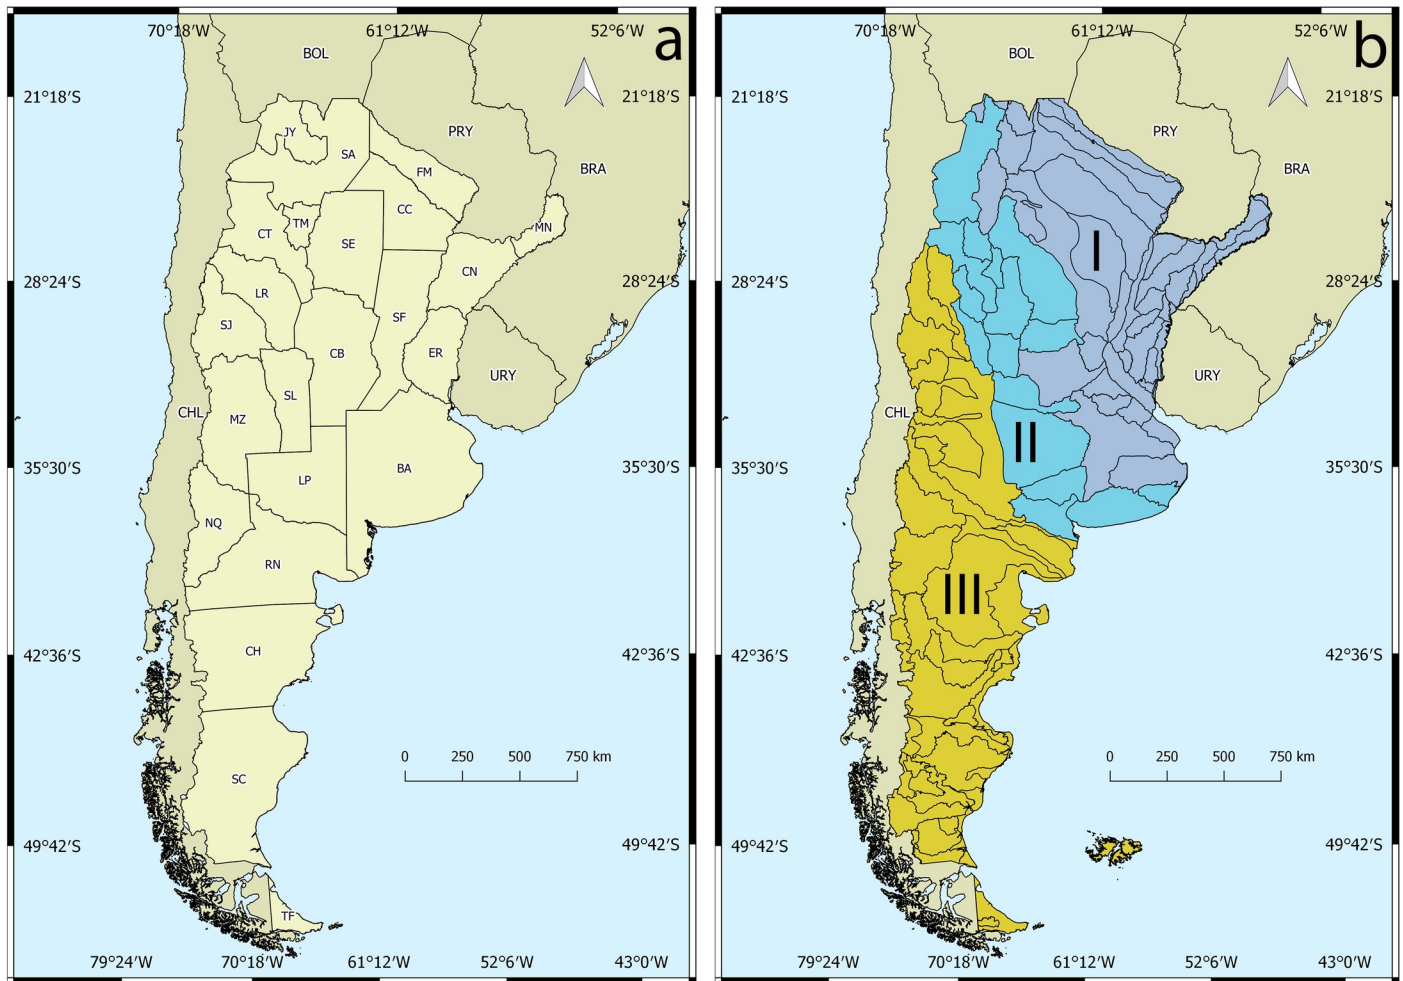

**Fig 1.** a) Political division of Argentina: Jujuy (JU), Salta (SA), Tucumán (TC), Formosa (FM), Chaco (CO), Misiones (MN), Corrientes (CN), Entre Ríos (ER), Catamarca (CT), San Juan (SJ), La Rioja (LR), San Luis (SL), Santiago del Estero (SE), Mendoza (MZ), Córdoba (CB), Santa Fe (SF), La Pampa (LP), Buenos Aires (BA), Neuquén (NQ), Río Negro (RN), Chubut (CH), Santa Cruz (SC), Tierra del Fuego, Antártida e Islas del Atlántico Sur (TF). b) Surface Drainage Basins of Argentina [40], [41] in South American Hydrographic regions [43]. I: The Plata basin, II: Border strip of the Brasilica (North) and the Chilean-Patagonian (South West) Subregion and III: Chilean-Patagonian Subregion of the Atlantic Versant.

<https://doi.org/10.1371/journal.pone.0203616.g001>

presented only two genera (*Diplodon* and *Anodontites*) with one species each, *D. (D.) chilensis* and *A. (A.) puelchanus*.

**Mycetopodidae.** Its distribution ranges from northern Argentina (MACN: 20852) to Patagonia (MACN: 20240), mainly in the Río de la Plata, Paraná and Uruguay rivers (Fig 3A–3E).

### Genus *Anodontites*

The genus *Anodontites* is the second most diverse in the region. *Anodontites* species are present in 38 Argentinean basins (Fig 3A). Their distribution ranges from the Pucará de Tilcara in the San Francisco River Basin (MACN 20852) to the Río Negro Basin (MACN: 20240), located in the Patagonian region. The highest number of species is mainly concentrated in The Plata Basin (seven species). The most widely distributed species is *A. trapesialis* (Lamarck, 1819), which has been recorded from the San Francisco River Basin from northern Argentina (MLP 4522) to the Buenos Aires Province (MLP 13068).

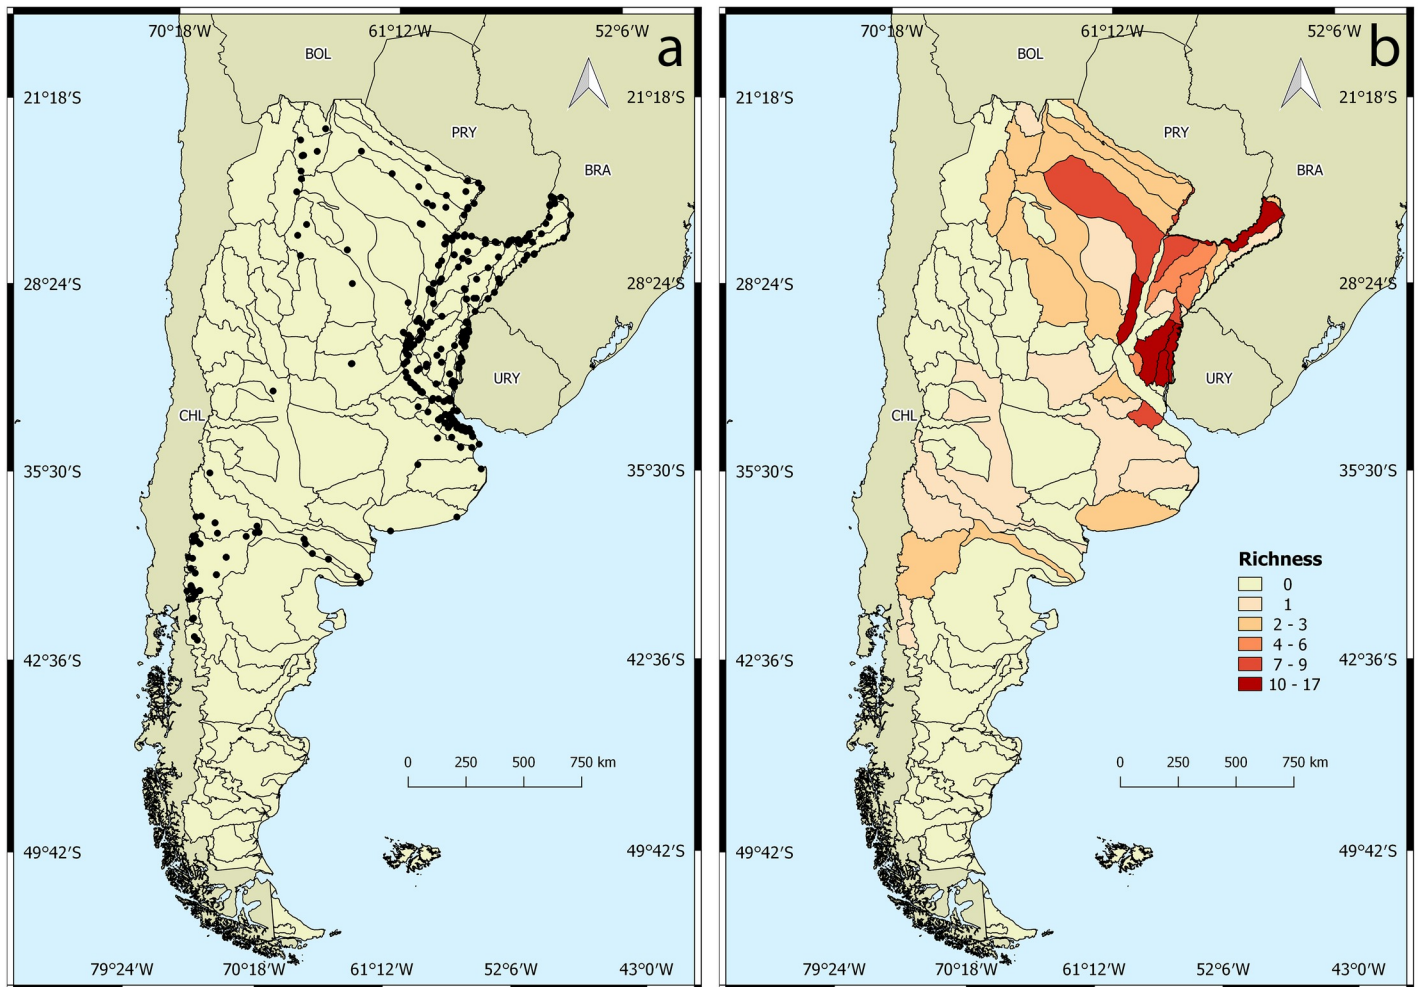

**Fig 2. Spatial analysis of unionida in Argentina.** a) Georeferenced lots in surface drainage basins. b) Unionida richness.

<https://doi.org/10.1371/journal.pone.0203616.g002>

### Genus *Mycetopoda*

Three species of *Mycetopoda* are cited for Argentina, *M. legumen* (Martens, 1888), *M. siliquosa* (Spix, 1827) and *M. soleniformis* Orbigny, 1835, which are mainly present in The Plata Basin. *Mycetopoda* lots were recorded in 18 basins, mainly on the Paraná and Uruguay rivers (Fig 3B).

### Genus *Monocondylaea*

The genus *Monocondylaea* has records in 12 basins on the Paraná and Uruguay rivers and their tributaries, with some records in the Río de la Plata (MLP 13195; MLP 5809) (Fig 3C). Four species are cited for Argentina (Table 1). *Monocondylaea corrientensis* (Orbigny, 1835) and *M. paraguayana* (Orbigny, 1835) are the species with greatest distribution range with records in the provinces of Misiones, Corrientes, Entre Ríos and Buenos Aires.

### Genus *Fossula*

This genus is monotypic, *Fossula fossiculifera* (d'Orbigny, 1835). Three lots were georeferenced for *F. fossiculifera*, all on the Paraná River: (MLP 5844); (MLP 1775–1); (MLP 5750) (Fig 3D).

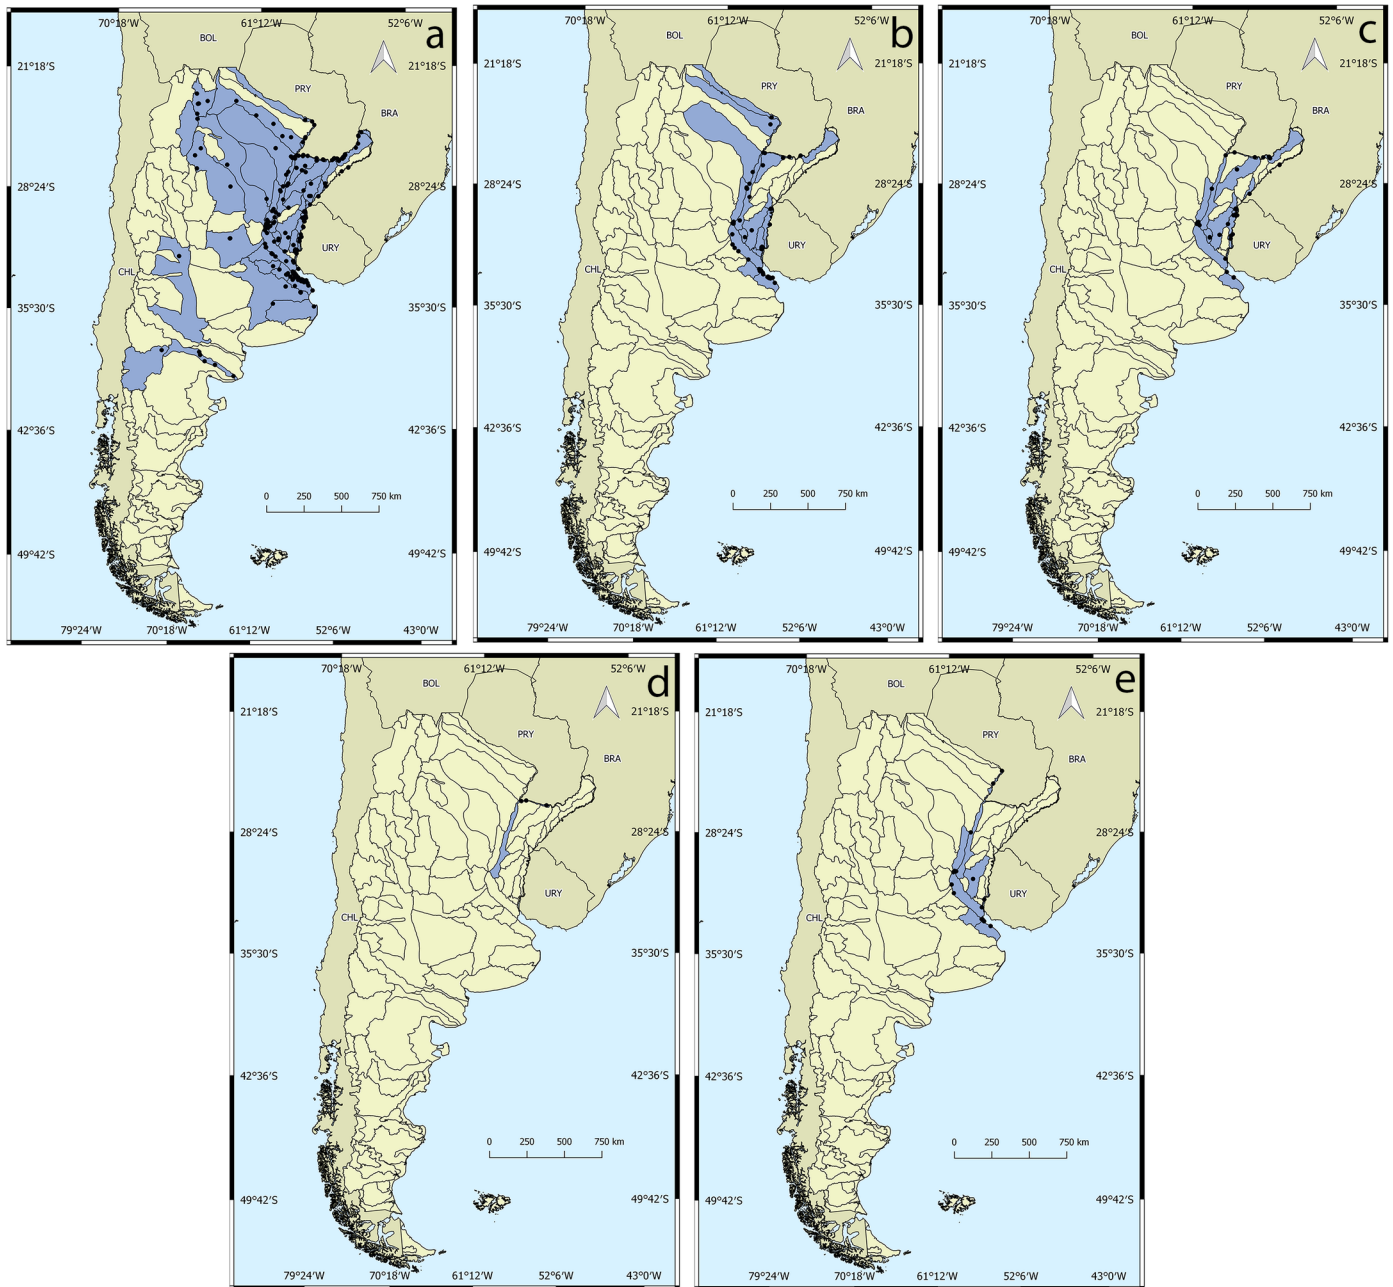

**Fig 3. Distribution of genera in the family Mycetopodidae.** a) *Anodontites*, b) *Mycetopoda*, c) *Monocondylaea*, d) *Fossula*, e) *Leila*. Black dots indicate georeferenced lots for each genus. Blue areas show surface drainage basins with presence of the genera.

<https://doi.org/10.1371/journal.pone.0203616.g003>

### Genus *Leila*

Almost all the georeferenced records of *Leila* are related to the Paraná and Uruguay rivers and their tributaries (Fig 3E) and some records were located in the Río de la Plata River. Only one species in Argentina, *Leila blainvilliana* (Lea, 1834) (MACN 6287, 6342, 7782).

**Hyriidae.** The distribution of the Hyriidae family ranges from the upper basin of the Bermejo River in Salta Province (MLP 6377; 6376) to Lake Futalufquen in Patagonia (MACN 25894). In total, 806 lots were georeferenced, with records in 56 drainage basins (Fig 4A and 4B).

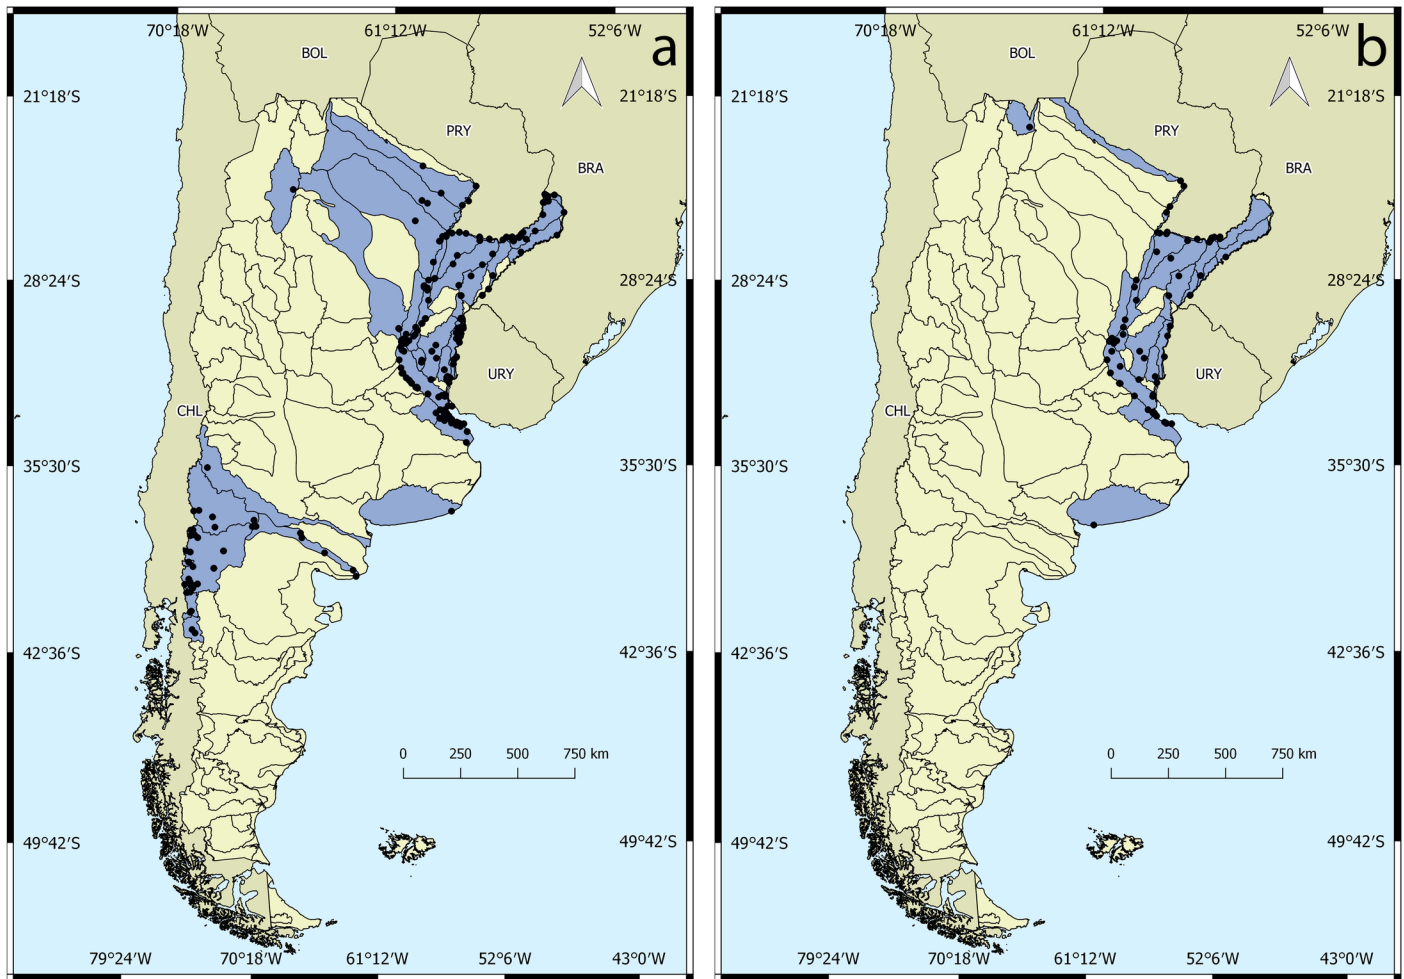

**Fig 4. Distribution of genera of the family Hyriidae.** a) *Diplodon*, b) *Castalia*. Black dots indicate georeferenced lots for each genus. Blue areas show surface drainage basins with presence of the genera.

<https://doi.org/10.1371/journal.pone.0203616.g004>

### Genus *Diplodon*

The genus *Diplodon* is the most widely distributed, with records in most basins where the family is present, mainly the basins of the Paraná and Uruguay rivers and their tributaries. A total of 649 lots of the genus *Diplodon* were georeferenced, with 12 species distributed over 33 drainage basins, mostly belonging to The Plata Basin (Fig 4B). *Diplodon (D) chilensis* is the only species of Hyriidae present in Patagonia, very common in lakes and rivers in the region.

### Genus *Castalia*

Two species were cited for Argentina, *Castalia inflata* Orbigny, 1835 and *C. psammoica* (Orbigny, 1835), with records in 23 drainage basins, mainly on the Paraná and Uruguay rivers and their tributaries (Fig 4B). Their distribution ranges from the upper basin of the Bermejo River (MLP 6377; 6376) to southern Buenos Aires Province (MLP 1413).

### Distribution of unionida in the Argentinean Protected Areas (APA)

The APA cover less than 15% of the national territory (Fig 5A), protecting a small but significant part of the ecoregions in southern South America. A total of 51 basins have at least one



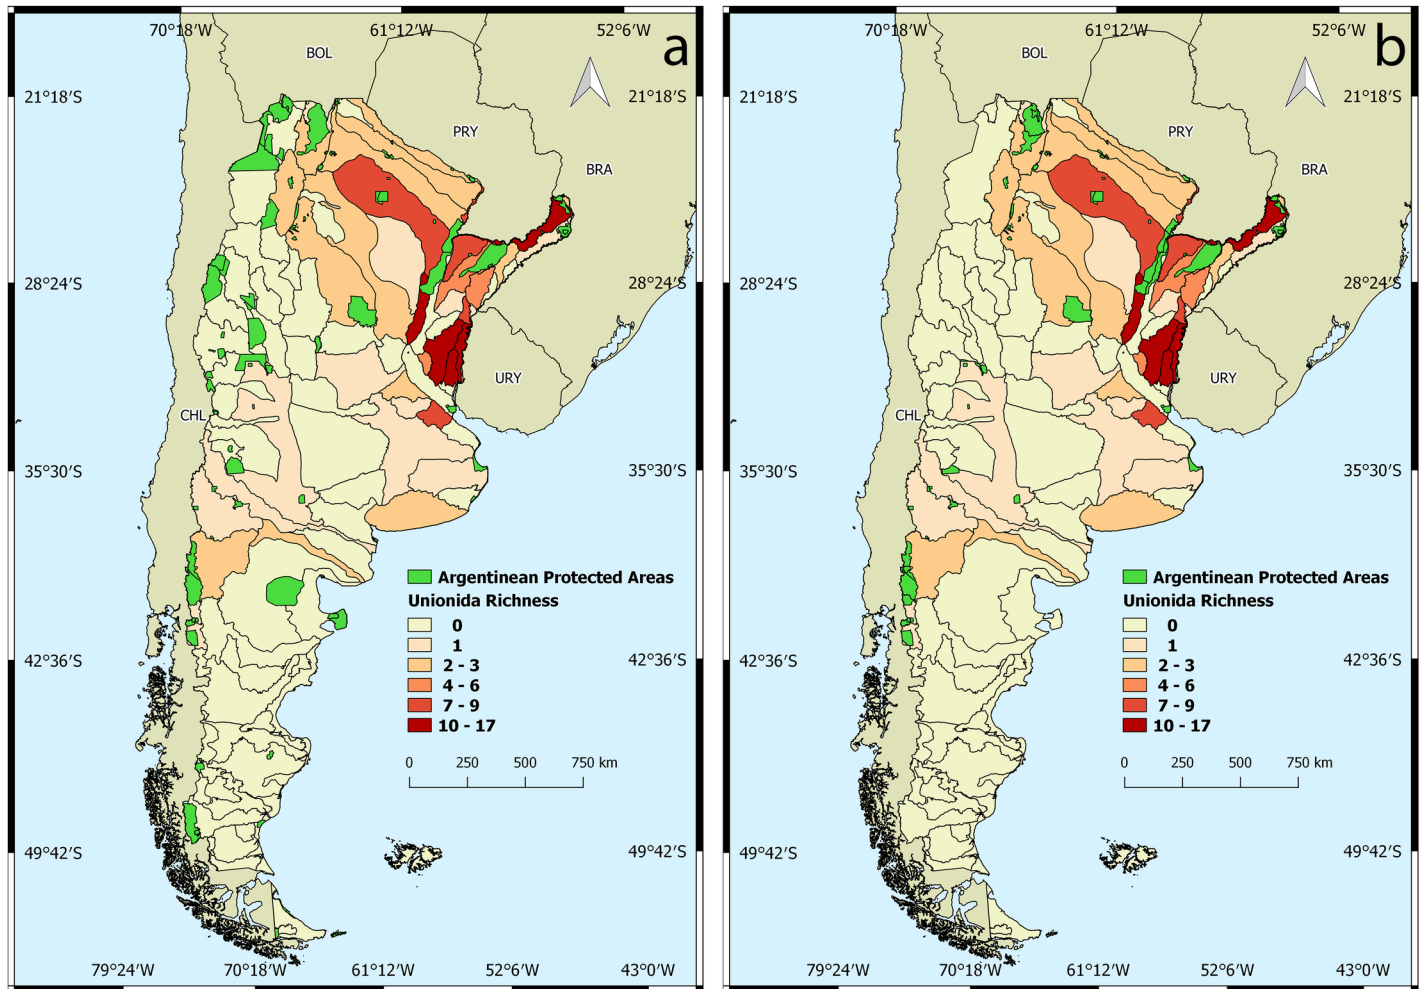

**Fig 5. Spatial analysis between naiad presence in the Argentinean Surface Drainage Basins and the Argentinean protected areas (APA).** a) APA and Unionida richness. b) APA within Unionida richness distribution.

<https://doi.org/10.1371/journal.pone.0203616.g005>

APA. The results of the distribution of naiads in the APA shows that only eighteen of the APA have at least one record of Unionida. Nine correspond to a National Park jurisdiction: Copo, Pilcomayo, Iguazú, Nahuel Huapi, Lanín, Los Alerces, Lago Puelo and El Palmar; two correspond to a Provincial Park jurisdiction: Salto Encantado (Misiones), Iberá (Corrientes); three correspond to a biosphere reserve: Yungas, Yabotí and Delta del Paraná; four correspond to a Ramsar site: Jaaukanigas, Lagunas and Esteros del Iberá, Chaco wetlands, Pilcomayo river. Only twelve APA have four or more species of naiads cited in the area. This means that less than 10% of the protected areas on the national territory has a significant richness of Unionida. The distributional range of the unionidan presented in this work indicates that more than 95% of this area is not in a protected habitat (Table 2). Most of the basins with four or more species of naiads are part of The Plata Basin, which is also the hydrographic system with the lowest number of protected areas in Argentina (Fig 5B).

### Discussion

Understanding the distribution range of this group is critical to determining its state of decline. However, the group is often ignored or underestimated. In this regard, collection data

**Table 2. Area analysis of unionida distribution.**

|                         | SDB <sup>a</sup> | SDB/Unionida <sup>b</sup> | APA <sup>c</sup> | APA/Unionida <sup>d</sup> |
|-------------------------|------------------|---------------------------|------------------|---------------------------|
| Area (Km <sup>2</sup> ) | 2,791,810        | 1,119,852                 | 350,000          | 116,916                   |

<sup>a</sup> Surface Drainage Basins

<sup>b</sup> Surface Drainage Basins with presence of Unionida

<sup>c</sup> Argentinean Protected Areas

<sup>d</sup> Argentinean Protected Areas with presence of Unionida

<https://doi.org/10.1371/journal.pone.0203616.t002>

can be used to determine this distributional range [50]. This study reports the results of an analysis of Argentina’s main malacological collections. It provides digital georeferenced data, essential for further studies on a regional scale, constituting a starting point for focusing conservation efforts on the taxa studied.

The more than 1,500 lots georeferenced in this work correspond to a broad time period (1900 to 2011). Thus, the maps created on the basis of this information correspond to known distribution limits of the organisms under analysis. Klunzinger et al. [40] report that such limits reflect the influence of environmental factors on distribution patterns of unionidan species. Factors such as change in land use, pollution, modifications in courses and entry of species with invasive potential, among others, may modify the distributional range presented. This approach provides a more accurate approximation to unionidan geographical patterns of distribution over the Surface Drainage Basins in the region. Furthermore, specific features of the naiad’s life cycle need to be considered [24], [25]. For example, some life cycles include a parasitic phase, some are very long-lived (certain European species live as long as 200 years) [48] and some individuals that reach maturity are potentially resistant to certain environmental changes, enabling them to survive for a long time [38], [39]. This particular life history is not necessarily shortened by environmental alterations such as the construction of dams and reservoirs [22]. Nevertheless, these alterations may displace fish populations and prevent them from taking part in unionidan species life cycles. In consequence, even though these populations persist today, they are liable to become extinct because they may be unable to complete their life cycle since their larvae would lack fish hosts to parasitize if the fish were extinct or displaced from the environment [50]. Thus, these populations have no future life expectation, being functionally extinct, as described by Parmalee and Bogan [51]. On a larger scale, this scenario can generate an *extinction debt* or *future extinction* of a great number of mussels caused by the habitat lost in the Neotropical Region [11], [52].

Previous studies in Argentina have focused on naiads’ distribution and developed maps based on the literature and analysis of collections [6], [9]. The present work also considered drainage basins and provided greater precision by using georeferenced information data in the distribution analysis. The naiad richness analysis in the Argentinean territory presented in this work tends to match the reference literature [6], [9], [17], [18], [20].

In South America, out of the 112 species cited by Pereira et al. [5], 20 are classified by the IUCN [53]. Of these, one species is *Critically Endangered* (CR), two are *Vulnerable* (VU), and seventeen are considered *Not Threatened* categories (eleven are *Least Concern* (LC) and six are *Data Deficient* (DD)). Of the Unionida species cited for Argentina, only six (18%) have been classified by the IUCN [53], four of which are *Least Concern* (*Anodontites* (A.) *tenebricosus*, *A. (Lamproscapha) ensiformis*, *Diplodon* (D.) *chilensis* and *D. (D.) parallelopipedon*), while two are *Data Deficient* (*A. (A.) elongatus* and *D. (D.) hylaeus*). The neighboring countries have different percentages, and in all cases, the number of species with *Not Threatened* categories or *Not*

Evaluated (NE) is greater (Table 3). Brazil has twelve classified species (15%), Uruguay has six (18%), Bolivia has eight (40%), Paraguay has six (22%) and Chile has one (*D. (D.) chilensis*), classified as *Least Concern* [53].

Regional efforts to classify the Unionida species in Brazil and Uruguay vary. Their results differ from the ones in the IUCN Red List [53]. In Brazil, 26 species (31%) were included in the Brazil Red Book [54] and in Uruguay, 30 species (88%) were considered *Species Prioritized for Conservation* [55]. However, a recent re-evaluation of the Brazil Red Book conducted by the Instituto Chico Mendes para a Conservação da Biodiversidade [56], with a rigid application of the IUCN criteria, listed only two species as threatened with the *Endangered* (EN) category, leaving 24 species excluded from the previous Brazil Red Book [54]. It seems unlikely that the environmental conditions of the freshwater environment of Brazil has improved over these few years [11], [57]. This leads to a problem related to the use of IUCN global criteria for regional analysis, especially in groups like the Neotropical Unionida where the lack of basic information is so important.

Spatial analysis showed that almost half of the basins had naiads present in at least one protected area. However, less than 14% of the APA contains records of species of unionidan and only 9% contains records of four or more species. This percentage clearly establishes how urgent it is to create new protected habitats for freshwater environments where the populations of naiads can grow and stabilize.

Despite being considered a hotspot of freshwater biodiversity, The Plata Basin is also the hydrographic system with least protected areas of Argentina and, according to the World Wildlife Fund, one the world's ten most threatened river basins [58]. The major threats for this freshwater environment are habitat loss caused by dams and infrastructure projects, pollution, invasive species and climate change [58], [59], all of which affect freshwater bivalve populations directly [5]. All these threats are not independent, having a synergistic impact on freshwater habitats. For example, the construction of dams changes the dynamics of the river transforming it into a lentic environment and reducing the sediments flowing downstream [57]. These changes have allowed the settlement and colonization of invasive species as *C. fluminea* and *L. fortunei* in the high Paraná River in Brazil [5]. Another impact related to the construction of dams is the loss of host fishes and the interruption of the dispersion of parasitic larvae. The Plata Basin is also considered the hydrographic region with the highest richness and the greatest diversity of freshwater gastropods, with a high number of species and endemism [9], [46], [60]. These considerations are also valid for freshwater bivalves, with a high richness compared to others hydrographic systems of southern South America [5], [9], [61]. Despite this particular richness and high diversity of freshwater mollusks, to date there is no initiative, governmental or private, for the creation of protected areas for the conservation of this important group of animals. This shows that conservation management and a shift in the design of new protected areas are necessary for preserving the diversity of freshwater fauna in

**Table 3. IUCN categorization for the unionidan of Argentina and neighboring countries [53].** *Critically Endangered (CR), Endangered (EN), Vulnerable (VU), Near Threatened (NT), Least Concern (LC), Data Deficient (DD), Not Evaluated (NE).*

|           | CR | EN | VU | LC | DD | NE | Total of species |
|-----------|----|----|----|----|----|----|------------------|
| Argentina | 0  | 0  | 3  | 5  | 4  | 70 | 82               |
| Brazil    | 0  | 0  | 3  | 5  | 4  | 70 | 82               |
| Uruguay   | 0  | 0  | 1  | 3  | 2  | 28 | 34               |
| Bolivia   | 0  | 0  | 0  | 5  | 3  | 12 | 20               |
| Paraguay  | 0  | 0  | 1  | 4  | 1  | 21 | 27               |
| Chile     | 0  | 0  | 0  | 1  | 0  | 0  | 1                |

<https://doi.org/10.1371/journal.pone.0203616.t003>

general and of Unionida in particular. The results of the present study will enable future research to enable the estimation of endangered status and degree of conservation of unionidan species such as by detecting priority areas for conservation, selecting of areas for population studies, and species modelling linking distributional ranges with environmental variables and climatic change.

## Supporting information

**S1 Appendix. Database of unionida specimens of the Argentina's main malacological collections reviewed in the present work.**

(XLSX)

## Acknowledgments

We would like to thank Dr. C. Damborenea and an anonymous reviewer for their helpful comments and suggestions in a previous draft of this manuscript. We would also like to thank to the collection managers for providing the museum databases.

## Author Contributions

**Conceptualization:** Santiago Torres, Gustavo Darrigran.

**Data curation:** Santiago Torres, Luciana Cao.

**Formal analysis:** Santiago Torres, Luciana Cao, Diego Eduardo Gutiérrez Gregoric.

**Investigation:** Santiago Torres, Luciana Cao, Diego Eduardo Gutiérrez Gregoric, Gustavo Darrigran.

**Methodology:** Santiago Torres, Gustavo Darrigran.

**Supervision:** Gustavo Darrigran.

**Writing – original draft:** Santiago Torres, Luciana Cao, Diego Eduardo Gutiérrez Gregoric, Micaela de Lucía, Francisco Brea, Gustavo Darrigran.

**Writing – review & editing:** Santiago Torres, Luciana Cao, Diego Eduardo Gutiérrez Gregoric, Micaela de Lucía, Francisco Brea, Gustavo Darrigran.

## References

1. Graf DL. Patterns of freshwater bivalve global diversity and the state of phylogenetic studies on the Unionida, Sphaeriidae, and Cyrenidae, *American Malacological Bulletin*. 2013; 31: 135–153.
2. Graf DL, Cummings KS. Palaeoheterodont diversity (Mollusca: Trigonioidea + Unionida): what we know and what we wish we knew about freshwater mussel evolution. *Zoological Journal of the Linnean Society*. 2006; 148: 343–394.
3. Graf DL, Cummings KS. Review of the systematics and global diversity of freshwater mussel species (Bivalvia: Unionida). *Journal of Molluscan Studies*. 2007; 73: 291–314.
4. Bogan AE, Roe KJ. Freshwater bivalve (Unioniformes) diversity, systematic, and evolution. Status and future directions. *Journal of the North American Benthological Society*. 2008; 27: 349–369.
5. Pereira D, Dreher Mansur MC, Duarte LDS, Schramm de Oliveira A, Mansur Pimpão D, Tasso Callil C, et al. Bivalve distribution in hydrographic regions in South America: historical overview and conservation. *Hydrobiologia*. 2014; 735: 15–44.
6. Bonetto A. Náyades de la Patagonia. *Revista de la Asociación de Ciencias Naturales del Litoral*. 1973; 4: 177–185.
7. Letelier S, Ramos AM. Distribución geográfica de *Diplodon (Diplodon) chilensis* (Gray, 1828) (Bivalvia: Hyriidae) basado en el material de la colección del Museo Nacional de Historia Natural (MNHNL), Santiago de Chile. *Amici Molluscarum*. 2006; 14: 13–17.

8. Parada E, Peredo S, Valenzuela J, Manuschovich D. Extension of the current northern distribution range of freshwater mussel *Diplodon chilensis* (Gray, 1828) (Bivalvia: Hyriidae) in Chile. *Gayana*. 2007; 71: 212–215.
9. Rumi A, Gutiérrez Gregoric DE, Núñez V, Darrigran G. Malacología latinoamericana. Moluscos de agua dulce de la República Argentina. *Revista de Biología Tropical*. 2008; 56: 77–111.
10. Santos-Neto GC, Beasley CR, Schneider H, Pimpão DM, Hoeh WR, Simone LRL, et al. Genetic relationships among freshwater mussel species from fifteen Amazonian rivers and inferences on the evolution of the Hyriidae (Mollusca: Bivalvia: Unionida). *Molecular Phylogenetics and Evolution*. 2016; 100: 148–159. <https://doi.org/10.1016/j.ympev.2016.04.013> PMID: 27071805
11. Miyahira IC, dos Santos SB, Dreher Mansur MC. Freshwater mussels from South America: state of the art of Unionida, especially Rhipidodontini. *Biota Neotropica*. 2017; 17: e20170341.
12. Ituarte C. Mollusca: Bivalvia. In: Domínguez E, Fernández H. (eds.). *Macroinvertebrados bentónicos sudamericanos: Sistemática y biología*. Fundación Miguel Lillo, Tucumán, Argentina; 2009. pp. 567–594.
13. Bonetto A. Acerca de la distribución geográfica de los Náyades de la República Argentina. *Physis*. 1961; 22: 259–268.
14. Bonetto A. Notas sobre los géneros *Castalina* y *Castalia* en el Paraná medio e inferior. Dirección General de Recursos Naturales, Ministerio de Agricultura y Ganadería, Santa Fe, Argentina. 1961. 1–11.
15. Bonetto A. Especies del género *Mycetopoda* en el sistema hidrográfico del Río de la Plata. *Revista del Museo Argentino de Ciencias Naturales Bernardino Rivadavia*. 1962; 8: 173–182.
16. Bonetto A. Las almejas sudamericanas de la tribu Castaliini. *Comunicaciones Instituto Nacional de Limnología*. 1965; 25: 187–196.
17. Bonetto A. Las “ostras de agua dulce” (Muteloidea: Mutelidae). Su Taxonomía y distribución geográfica en el conjunto de las naiades del mundo. *Biociencias*. 1967; 5: 113–142.
18. Castellanos ZA. Almejas nacaríferas de la República Argentina. Secretaría de Estado de Agricultura y Ganadería de la Nación. Dirección general de pesca y Conservación de la Fauna. *Publicación miscelánea n° 421*. 1960.
19. Castellanos ZA. Contribución al estudio biológico de almejas nacaríferas del Río de la Plata. *Revista del Museo de La Plata*. 1965; 8: 99–147.
20. Castellanos ZA, Landoni NA. La familia Mycetopodidae Gray, 1840 en la República Argentina. In: Ringuelet R. A. (ed.). *Fauna de Agua Dulce de la República Argentina*. FECIC, Buenos Aires; 1990. 86 pp.
21. Dreher Mansur MC, Pinheiro dos Santos C, Pereira D, Padula Paz IC, Leite Zurita ML, Raya Rodríguez MT, et al. (Eds.) 2012. *Moluscos Límnicos Invasores no Brasil. Biología, prevenção, controle*. Redes Editora. Porto Alegre. 411 pp.
22. Dreher Mansur MC, Silva MGO. Description of glochidia of five species of freshwater mussels (Hyriidae: Unionioidea) from South America. *Malacologia*. 1999; 41: 475–483.
23. Ricciardi A, Rasmussen JB. Extinction rates of North American freshwater fauna. *Conservation Biology*. 1999; 13: 1220–1222.
24. Strayer DL, Downing JA, Haag WR, King TL, Layzer JB, Newton TJ, et al. perspectives on pearly mussels, North America’s most imperiled animals. *BioScience*. 2004; 54: 429–439.
25. Cowie RH, Régnier C, Fontaine B, Bouchet P. Measuring the Sixth Extinction: what do mollusks tell us. *The Nautilus*. 2017; 131: 3–41.
26. Bogan AE. Freshwater Bivalve Extinctions (Mollusca: Unionida): A Search for Causes. *American Zoologist*. 1993; 33: 599–609.
27. Bogan AE. Conservation and extinction of the freshwater molluscan fauna of North America. In: Sturm C. F., Pearce T. A., and Valdés A. (Eds.). *The Mollusks: A Guide to Their Study, Collection, and Preservation*. American Malacological Society; 2006. pp. 373–383.
28. Clavijo C. The Pearl industry and pioneering research in biology and conservation of pearl mussel (Unionida) in the Río de la Plata basin. *Tentacle*. 2017; 25: 14–15.
29. Beasley CR. The impact of exploitation on freshwater mussels (Bivalvia: Hyriidae) in the Tocantins river, Brazil. *Studies on Neotropical Fauna and Environment*. 2001; 36: 159–165.
30. Darrigran G. Longitudinal distribution of molluscan communities in the Río de la Plata estuary as indicators of environmental conditions. *Freshwater Mollusca*. 1999; 8: 1–12.
31. Darrigran G, Pastorino G. The recent introduction of Asiatic Bivalve, *Limnoperna fortunei* (Mytilidae) into South America. *The Veliger*. 1995; 38: 183–187.
32. Pereyra PJ, Bulus Rossini G, Darrigran G. Toxicity of Neem’s oil, a potential biocide against the invasive mussel *Limnoperna fortunei* (Dunker 1857). *Anais da Academia Brasileira de Ciências*. 2012; 84: 1065–1071. PMID: 22990602

33. Ituarte C. Primera noticia acerca de la introducción de pelecípodos asiáticos en el área rioplatense (Mollusca, Corbiculidae). *Neotrópica*. 1981; 27: 79–82.
34. Darrigran G, Damborenea MC. Ecosystem engineering impacts of *Limnoperna fortunei* in South America. *Zoological Science*. 2011; 28: 1–7. <https://doi.org/10.2108/zsj.28.1> PMID: 21186940
35. Parodiz JJ, Bonetto AA. Taxonomy and zoogeographic relationships of the South American naiades (Bivalvia: Unionacea and Mutelacea). *Malacologia*. 1963; 1: 179–213.
36. Parodiz JJ. The species complex of *Diplodon delodontus* (Lamarck, 1819) (Unionacea-Hyriidae). *Malacologia*. 1973; 14: 247–270.
37. Parodiz JJ. *Diplodon charruanus* (d'Orbigny, 1835): a revision. *Bulletin of the American Malacological Union*. 1974; 39: 18–19.
38. Rocchetta I, Pasquevich MY, Heras H, Ríos de Molina MC, Luquet CM. Effects of sewage discharges on lipid and fatty acid composition of the Patagonian bivalve *Diplodon chilensis*. *Marine Pollution Bulletin*. 2014; 79: 111–119.
39. Yusseppone MS, Betina J, Lomovasky BJ, Luquet CM, Ríos de Molina MDC, Rocchetta I. Age- and sex-dependent changes in morphometric and metabolic variables in the long-lived freshwater mussel *Diplodon chilensis*. *Marine and Freshwater Research*. 2015; 67: 1938–1947.
40. Klunzinger MW, Jones HA, Keleher J, Morgan DL. A new record of *Lortietta froggatti* Iredale, 1934 (Bivalvia: Unionida: Hyriidae) from the Pilbara region, Western Australia, with notes on anatomy and geographic range. *Records of the Western Australian Museum*. 2013; 28: 1–6.
41. IUCN. Guidelines for Application of IUCN Red List Criteria at Regional and National Levels: Version 4.0. Gland, Switzerland and Cambridge, UK: IUCN. 2012; iii + 43pp.
42. Wiczorek J, Guo Q, Hijmans R. The point radius method for georeferencing locality descriptions and calculating associated uncertainty. *International Journal of Geographical Information Science*. 2004; 18: 745–767.
43. Bonetto AA. Austral rivers of South America. *Limnology Now: A Paradigm of Planetary Problems*. 1994; 425–472.
44. Giraut M, Ludueña S, Postiglioni A, Rey C, Dente M, Sol I. Cartografía hídrica superficial digital de la República Argentina. X Congreso Nacional de Cartografía y VII Semana Nacional de Cartografía. Buenos Aires, Argentina. 2000.
45. SsRH (Subsecretaría de Recursos Hídricos de la Nación). Atlas Digital de Cuencas y Regiones Hídricas Superficiales de la República Argentina—Versión 2010. 2011.
46. <https://www.argentina.gob.ar/ambiente/tierra/protegida/sifap>. Last visit 06 June 2018.
47. Núñez V, Gutiérrez Gregoric DE, Rumi A. Freshwater gastropod provinces from Argentina. *Malacologia*. 2010; 53: 47–60.
48. Instituto Geográfico Militar. Adopción del Nuevo Marco de Referencia Geodésico Nacional. POSGAR 07 RAMSAC. Ministerio de Defensa, División Geodesia. 2009. [http://ramsac.ign.gob.ar/posgar07\\_pg\\_web/documentos/POSGAR\\_07\\_RAMSAC.pdf](http://ramsac.ign.gob.ar/posgar07_pg_web/documentos/POSGAR_07_RAMSAC.pdf).
49. Rumi A, Gutiérrez Gregoric DE, Núñez V, César II, Roche MR, Tassara MP, et al. Freshwater gastropoda from Argentina: species richness, distribution patterns, and an evaluation of endangered species. *Malacologia*. 2006; 49: 189–208.
50. Ehrlén J, Morris WF (2015). Predicting changes in the distribution and abundance of species under environmental change. *Ecology Letters*. 2015; 18: 303–314. <https://doi.org/10.1111/ele.12410> PMID: 25611188
51. Parmalee PW, Bogan AE 1998. The freshwater mussels of Tennessee. The University of Tennessee Press. Knoxville. 328 pp.
52. Haag WR (2012). North American freshwater mussels: natural history, ecology and conservation. Cambridge. University Press, Cambridge. 535 pp.
53. IUCN. The IUCN Red List of Threatened Species. Version 2017–3. <<http://www.iucnredlist.org>>. Downloaded on 27 June 2018.
54. Barbosa Monteiro Machado A, Moreira Drummond G, Pereira Paglia A. (eds.) 2008. Livro vermelho da fauna brasileira ameaçada de extinção. 1.ed.— Brasília, DF: MMA; Belo Horizonte, MG: Fundação Biodiversitas 1420 pp.
55. Clavijo C, Scarabino F. Moluscos continentales. Pages 73–90 in Soutullo A, Clavijo C, Martínez-Lanfranco JA (eds). Especies prioritarias para la conservación en Uruguay. Vertebrados, moluscos continentales y plantas vasculares. SNAP/DINAMA/MVOTMA Y DICYT/MEC, Montevideo, Uruguay; 2013. pp 73–90.
56. Instituto Chico Mendes para a Conservação da Biodiversidade 2016. Sumário Executivo da Fauna Brasileira Ameaçada de Extinção. ICMBio, Brasília. 76 pp.

57. Santos SB, Miyahira IC, Salgado NC, Heydrich I, Pena MS, Colley E, et al. Observations on review of the list of endangered continental molluscs of Brazil. *Tentacle*. 2015; 23: 26–28.
58. Wong CM, Williams CE, Pittock J, Collier U, Schelle P. World's top 10 rivers at risk. WWF International, Switzerland. 2007; 14–16.
59. Suski CD, Cooke SJ. Conservation of aquatic resources through the use of freshwater protected areas: opportunities and challenges. *Biodiversity Conservation*. 2007; 16: 2015–2029.
60. Gutiérrez Gregoric DE, de Lucía M. Freshwater gastropods diversity hotspot: three new species from the Uruguay River (South America). *PeerJ*. 2016; 4: e2138. <https://doi.org/10.7717/peerj.2138> PMID: 27326385
61. Torres S, Darrigran G, Damborenea C (2013) Distribución del género *Diplodon* (Mollusca: Bivalvia: Hyriidae) en la Cuenca del Plata (Argentina) mediante el uso de colecciones biológicas. *AUGM/DOMUS Revista Electrónica del Comité de Medio Ambiente*. 2013; 5: 90–99.
